# Supplementary material
Source: ML conference proceedings conference paper supplement (https://openreview.net/forum?id=OsBM0sWwn_-)
Supplement: supplementary_material [file attachment]

531  
532  
533

**Supplementary Materials**  
**baller2vec: A Multi-Entity Transformer For**  
**Multi-Agent Spatiotemporal Modeling**

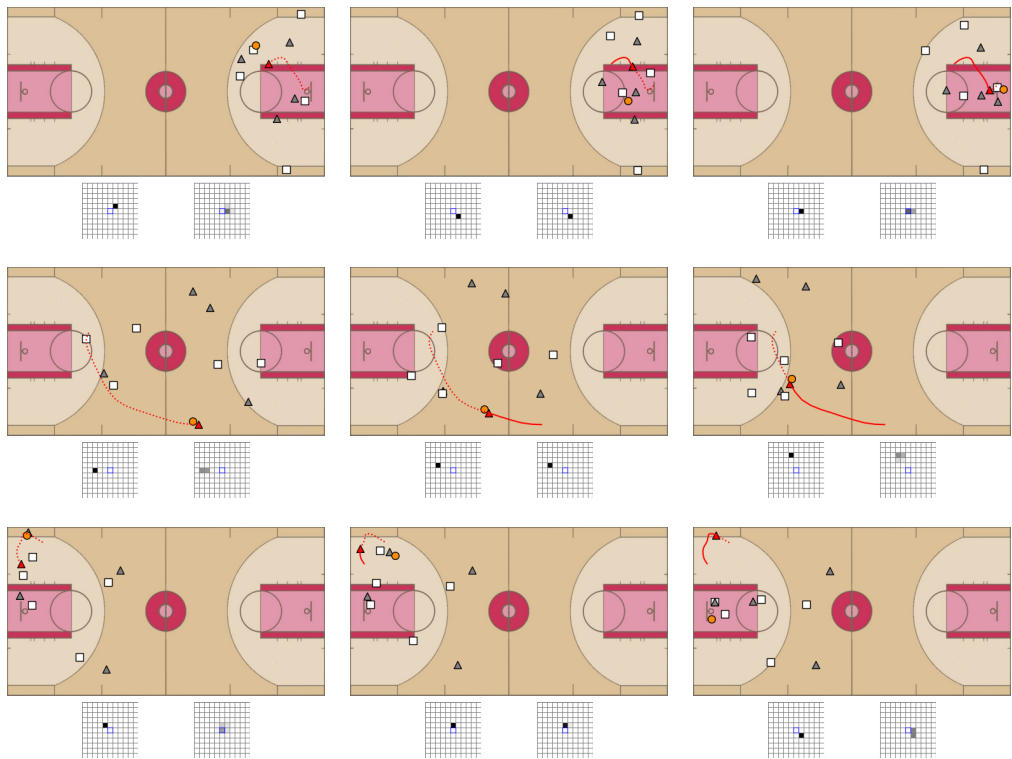

Figure S1: Additional examples of predicted player trajectory bin distributions in different contexts. Each row contains a different sequence, and the first column always contains the first frame from the sequence.

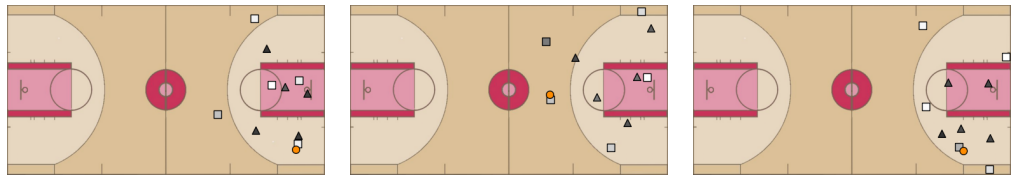

Figure S2: Additional examples of attention outputs for the head that focuses on the ball handler's teammates.

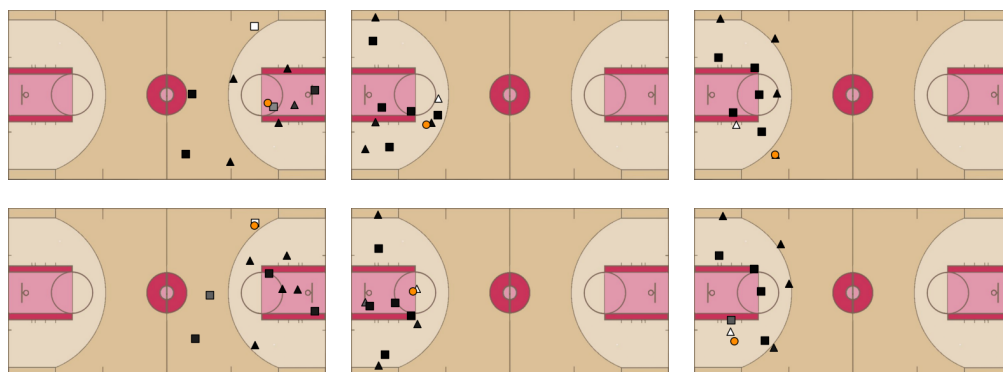

Figure S3: Additional examples of attention outputs for the head that anticipates passes. Each column contains a different sequence, and the top frame precedes the bottom frame in time.
